# Supplementary material for: Cognitive Training for Visuospatial Processing in Children Aged 5½ to 6 Years Born Very Preterm With Working Memory Dysfunction: A Randomized Clinical Trial
Source: PubMed Central journal article supplement (PMC10485729; doi:10.1001/jamanetworkopen.2023.31988), 2023-09-07
Supplement: jamanetwopen-e2331988-s002.pdf [file jamanetwopen-e2331988-s002.pdf]

## Supplemental Online Content

Gire C, Beltran Anzola A, Marret S, et al; EPIREMED Study Group. Cognitive training for visuospatial processing in children aged 5½ to 6 years born very preterm with working memory dysfunction: a randomized clinical trial. *JAMA Netw Open*. 2023;6(9):e2331988. doi:10.1001/jamanetworkopen.2023.31988

**eTable 1.** Collected Measures

### **eReferences**

**eTable 2.** Demographics and Clinical Characteristics of the Included and Nonincluded Children at Birth and at 5 Years Old

**eTable 3.** Description of Training Adherence in the Intervention Group

**eTable 4.** Training Adherence in the Intervention Group According to Parents' Socioprofessional Status and Educational Level With Missing Data Imputation

**eTable 5.** Sensitivity Analysis Adjusted With and Without Missing Data Imputations Restricted to Children Who Completed at Least 20 or 25 sessions of Training in the Intervention Group

**eTable 6.** Missing Data Distribution

This supplemental material has been provided by the authors to give readers additional information about their work.

**eTable 1.** Collected Measures

| Domains                                                   | Measures                                                                      | Population assessed | Description                                  | Baseline (EpiPage 2 database) | Inclusion visit | Intermediate visit | Final visit |
|-----------------------------------------------------------|-------------------------------------------------------------------------------|---------------------|----------------------------------------------|-------------------------------|-----------------|--------------------|-------------|
| <b><i>Clinical and sociodemographic data at birth</i></b> |                                                                               | Mother and child    |                                              |                               |                 |                    |             |
| Maternal and obstetrical factors                          | Maternal age                                                                  |                     |                                              | X                             |                 |                    |             |
|                                                           | Parents' socio-professional status                                            |                     |                                              | X                             |                 |                    |             |
|                                                           | Antenatal corticosteroid therapy with a full-course minimum                   |                     |                                              | X                             |                 |                    |             |
|                                                           | Antenatal administration of magnesium sulfate during the last hospitalization |                     |                                              | X                             |                 |                    |             |
|                                                           | Multiple pregnancies                                                          |                     |                                              | X                             |                 |                    |             |
|                                                           | Gestational age                                                               |                     |                                              | X                             |                 |                    |             |
|                                                           | Birth weight                                                                  |                     |                                              | X                             |                 |                    |             |
|                                                           | Sex of child                                                                  |                     |                                              | X                             |                 |                    |             |
| Neonatal and postnatal period                             | Mode of delivery                                                              |                     |                                              | X                             |                 |                    |             |
|                                                           | Apgar at 5 minutes                                                            | Child               |                                              | X                             |                 |                    |             |
|                                                           | Bronchopulmonary dysplasia                                                    |                     |                                              | X                             |                 |                    |             |
|                                                           | Postnatal corticotherapy                                                      |                     |                                              | X                             |                 |                    |             |
|                                                           | Presence of IVH                                                               |                     |                                              | X                             |                 |                    |             |
|                                                           | Necrotizing enterocolitis                                                     |                     |                                              | X                             |                 |                    |             |
|                                                           | Severe neonatal morbidity                                                     |                     |                                              | X                             |                 |                    |             |
|                                                           | Late onset sepsis                                                             |                     |                                              | X                             |                 |                    |             |
| Presence of severe lesions                                |                                                                               |                     | X                                            |                               |                 |                    |             |
| <b><i>Sociodemographic data at five years</i></b>         |                                                                               |                     |                                              |                               |                 |                    |             |
| <b><i>Family data</i></b>                                 | Maternal educational level                                                    |                     |                                              |                               | X               |                    |             |
|                                                           | Paternal educational level                                                    |                     |                                              |                               | X               |                    |             |
|                                                           | Siblings                                                                      |                     |                                              |                               | X               |                    |             |
|                                                           | Living situation (Housing situation to describe their environment)            |                     |                                              |                               | X               |                    |             |
| <b><i>Primary Outcomes</i></b>                            |                                                                               |                     |                                              |                               |                 |                    |             |
| Visual-spatial processing                                 | Visual-Spatial Index (VSI)                                                    | Child               | FSIQ Subtest – WPPSI-IV (Means: 100 ; CI:15) | X                             |                 | X                  | X           |
| <b><i>Secondary Outcomes</i></b>                          |                                                                               |                     |                                              |                               |                 |                    |             |

|                                                |                                             |         |                                                                                                                                                                                                  |   |   |   |   |
|------------------------------------------------|---------------------------------------------|---------|--------------------------------------------------------------------------------------------------------------------------------------------------------------------------------------------------|---|---|---|---|
| Working memory                                 | Working Memory Index (WMI)                  | Child   | FSIQ Subtest - WPPSI-IV (Means: 100 ; CI:15)                                                                                                                                                     | x |   | x | x |
| Motor performance                              | Manual Dexterity, Aiming, Catching, Balance | Child   | MABC-2 Subtests                                                                                                                                                                                  | x |   |   |   |
| Attention and Executive Functioning            | Statue                                      | Child   | NEPSY-2 Subtest (Means:10; CI:3)                                                                                                                                                                 | x |   | x |   |
|                                                | Speeded Naming                              |         |                                                                                                                                                                                                  | x |   | x |   |
|                                                | Design Fluency                              |         |                                                                                                                                                                                                  |   | x | x |   |
|                                                | Inhibition                                  |         |                                                                                                                                                                                                  | x |   |   |   |
| Intellectual functioning                       | Auditory attention                          |         |                                                                                                                                                                                                  |   | x | x | x |
|                                                | Full Scale Intellectual Quotient (FSIQ)     | Child   | WPPSI-IV (Means: 100; CI:15)                                                                                                                                                                     | x |   | x |   |
|                                                | Verbal Comprehension Index (VCI)            |         |                                                                                                                                                                                                  | x |   | x |   |
|                                                | Fluid Reasoning Index (FRI)                 |         |                                                                                                                                                                                                  | x |   | x |   |
| Language skills*                               | Processing Speed Index (PSI)                |         |                                                                                                                                                                                                  | x |   | x |   |
|                                                | Lexicon                                     | Child   | CléA Subtest (Means: 100; CI:15)                                                                                                                                                                 |   | x | x |   |
|                                                | Phonology                                   |         |                                                                                                                                                                                                  |   | x | x |   |
|                                                | Morphosyntax                                |         |                                                                                                                                                                                                  |   | x | x |   |
|                                                | Resources                                   |         |                                                                                                                                                                                                  |   | x | x |   |
|                                                | Comprehension                               |         |                                                                                                                                                                                                  |   | x | x |   |
|                                                | Production                                  |         |                                                                                                                                                                                                  |   | x | x |   |
| Parental assessment of child's behavior        | Judgment                                    |         |                                                                                                                                                                                                  |   | x | x |   |
|                                                | Emotional Symptoms                          | Parents | Goodman Strengths and Difficulties Questionnaire                                                                                                                                                 |   | x | x |   |
|                                                | Conduct Problems                            |         |                                                                                                                                                                                                  |   | x | x |   |
|                                                | Hyperactivity                               |         |                                                                                                                                                                                                  |   | x | x |   |
|                                                | Peer Problems                               |         |                                                                                                                                                                                                  |   | x | x |   |
| Parental assessment of child's Quality of life | Prosocial Behavior                          |         |                                                                                                                                                                                                  |   | x | x |   |
|                                                | Total Deviance/Difficulties                 |         |                                                                                                                                                                                                  |   | x | x |   |
|                                                | Relationship with parents/family            | Parents | VSP-A Dimension                                                                                                                                                                                  |   | x | x |   |
|                                                | School performance                          |         | VSP-A Dimension                                                                                                                                                                                  |   | x | x |   |
| Educational assistance                         | Assistance at school                        | Parents | Relationship with teacher                                                                                                                                                                        |   | x | x |   |
|                                                |                                             |         | Special needs teaching assistant (SNA)/assistance by a professional other than an SNA/technical aid/personalized education plans for children with disabilities other types of support at school |   | x |   |   |

|                                          |                                                           |         |                                                                                                                                                                                                                                     |   |   |
|------------------------------------------|-----------------------------------------------------------|---------|-------------------------------------------------------------------------------------------------------------------------------------------------------------------------------------------------------------------------------------|---|---|
| Allied health intervention               | Medical consultation                                      | Parents | Follow-up by a specialist center (Early Medial-Social Action Centers and Medical Psychologic Centers of Early Childhood) or by a professional (a psychologist/a psychometrician/an orthoptist/a speech therapist/a physiotherapist) |   |   |
| Parents' anxiety                         | Anxious state score                                       | Parents | State-Trait Anxiety Inventory (STAI)                                                                                                                                                                                                | x | x |
|                                          | Anxious trait score                                       |         |                                                                                                                                                                                                                                     | x | x |
| Schooling of child assessed by a teacher | Five Verbal skills, five nonverbal skills, class behavior | Teacher | GSA questionnaire                                                                                                                                                                                                                   | x | x |

Abbreviations: FSIQ = Full-Scale Intelligence Quotient; WPPSI-IV=Wechsler Preschool and Primary Scale of Intelligence, Fourth Edition; MABC-2=The Movement Assessment Battery for Children-Second Edition; NEPSY-2=NEuroPSYchology assessment - Second Edition; VSP-A=Perceived Quality of Life and Health of Adolescents and Children Questionnaire; GSA=Global School Adaptation score.

Notes<sup>1</sup>: **Primary endpoint:** The visual-spatial processing will be assessed by using the visuospatial index (VSI) of the WPPSI-IV at the inclusion visit, the six-month post-intervention (+/- 2 months) and at 18-months post-intervention (+/- 2 months). This index consists of two subtests: block design and object assembly. The average score is 100 with a standard deviation of 15. Rationale for the primary endpoint: The visual perceptual integration testing performance for VPs is poorer than those born full term, and these VPs present with a visuo-constructive dyspraxia. This deficit is connected to a poor integration of visual function, perceptual and/or fine motor skills (e.g., reproduction of a complex geometric figure). This disorder is three times more frequent in VP adolescents than in those born at term. Among those born extremely prematurely, 30% have results below the 15th percentile in visuospatial performance. The impact of WM rehabilitation on visuospatial skills is an interesting line of research, most particularly in premature infants. **Secondary endpoints:** The secondary endpoints, related to the children and to their parents, will be assessed at the inclusion visit and at the six-month post-intervention (+/- 2 months). Children's endpoints: The intellectual functioning and other cognitive processes will be obtained by global intellectual quotient (IQ) and IQ indices using the WPPSI-IV (Wechsler). The WPPSI-IV, designed for children ages 4-to-7-years-old, assesses the overall intellectual functioning (total comprehensive intellectual quotient) and specific cognitive processes. This is done through the main indices: verbal comprehension index, fluid reasoning index, visual spatial processing speed index, and the working memory index. The evaluation of the Working Memory by the Working Memory Index (WMI) in WPPSI-IV is uniquely visuospatial at this age. The average is 100 with a standard deviation of 15, as with all Wechsler Scales. The global FSIQ, as well as the main indices, will be assessed when monitoring the EPIPAGE cohort. It is lower for VP infants as compared to full-term infants. Executive and attention processes: The NEPSY-2 (NEuroPSYchology assessment - Second Edition) assesses the neuropsychological development of preschool and school age children (3–12 years old) and is used to obtain emerging executive functions in 5–6-year-olds. Auditory attention, statue, and design fluency are the only three subtests in the Executive and Attention Function domains which will be administered in this study. These three tests measure selective and divided attention in auditory modality, inhibition and Speeded Naming. A review of Van de Weijer-Bergsma,<sup>2</sup> which is confirmed by Mulder in a meta-analysis<sup>3</sup>, shows that the selective, divided and supported attentional domains are likely to be affected in VP preschoolers. Evaluation of language and its skills: Language is a complex mental process requiring an assessment of all its components. This assessment will be made from the CléA battery calibrated for those children between 2- and 15-years-old.<sup>4</sup> The battery consists of seven tests: lexicon: Known Digital Channels: a reflection of verbal learning ability, both cultural and cognitive; phonology: Oral Word Identification: capacity to give a word phonological and semantic judgment, morphosyntax: Rapid Denomination: timed tested; gives an indication treatment speed; resources: Word memory: explores the short-term mnemonic span; **comprehension:** Facial and oral praxis photographs: relevant in motor programming; **production:** Visual attention: inspired from NEPSY, questions the visual spatial component; **judgment:** Resolution of logical problems: ability to reason analogically (progressive matrices). Studies suggest that specific language disorders can be associated with specific WM impairments, particularly with the phonological loop.<sup>5,6</sup> Two meta analyses-studies demonstrate global language gaps/impairment in the very premature vs. the full-term child with deficits in learning ability, phonology, semantics, grammar, speech coherence and verbal reasoning.<sup>7,8</sup> Behavioral Evaluation: the child's behavior will be assessed with the Goodman Strengths and Difficulties Questionnaire, which includes 25 self-administered questions answered by the parents, and will assess any impact this intervention has on the child's behavior.<sup>9</sup> Evaluation of the child's quality of life (QoL): The quality of life of the children will be assessed using the Perceived Quality of Life and Health of Adolescents and Children Questionnaire (VSP-A [*Vie et Santé Perçue de l'Adolescent et de l'enfant*]) as reported by the parents.<sup>10</sup> The 49-item version portrays nine dimensions and index: relationships with parents/family, body image, vitality, relationships with friends, general well-being, leisure, school performance, relationships with teacher, and relationships with medical staff. A higher score, which ranges between 0 and 100, indicates a better QoL. The French norms are available through Ravens-Sieberer U 2007.<sup>11</sup> Schooling: This will be evaluated by the GSA questionnaire (Global School Adaptation score), a French tool completed and validated by the teacher,<sup>12</sup> and re-evaluated in a preschool population in 2013.<sup>13</sup> The questionnaire covers five verbal skills (verbal communication, verbal participation, vocabulary, syntax, pronunciation), five non-verbal abilities (memory, arithmetic, logical reasoning skills, manual dexterity and fine motor skills) and eight questions evaluating class behavior (compliance with rules, attention, autonomy, speed of accomplishing the task, self-esteem, ability to keep the pace and fatigability). The final question asks the teacher about possible future special educational needs of the child. Parents' endpoint: Anxiety: The Spielberger state-trait anxiety inventory (STAI) will be used to assess anxiety. The STAI is a self-reporting questionnaire consisting

of 40 items that measure both the state and trait scores. These scores range from 20 (absence of anxiety) to 80 (high anxiety). This questionnaire will assess if anxiety is impacted as a result of parental intervention (mother).<sup>14</sup> Rationale for the secondary endpoints: It is of value to measure the impact of intervention on the WM and on other non-trained brain processes as well as on parental anxiety, child behavior and parental perceptions of the child's quality of life.

#### References:

1. Gire C, Beltran Anzola A, Kaminski M, et al. A randomized EPIREMED protocol study on the long-term visuo spatial effects of very preterm children with a working memory deficit. *BMC Pediatr.* 2021;21(1). doi:10.1186/s12887-021-02867-x
2. van de Weijer-Bergsma E, Wijnroks L, Jongmans MJ. Attention development in infants and preschool children born preterm: a review. *Infant Behav Dev.* 2008;31(3):333-351. doi:10.1016/j.infbeh.2007.12.003
3. Mulder H, Pitchford NJ, Hagger MS, Marlow N. Development of executive function and attention in preterm children: a systematic review. *Dev Neuropsychol.* 2009;34(4):393-421. doi:10.1080/87565640902964524
4. Charollais A, Stumpf MH, De Quelen R, et al. Delayed language development at two years of age in very preterm infants in the Perinatal Network of Haute-Normandie. *Early Hum Dev.* 2014;90(12):891-892. doi:10.1016/j.earlhumdev.2014.10.001
5. Adams AM, Gathercole SE. Limitations in working memory: implications for language development. *Int J Lang Commun Disord.* 2000;35(1):95-116.
6. Rodrigues A, Befi-Lopes DM. Phonological working memory and its relationship with language development in children. *Fono Rev Atualizacao Cient.* 2009;21(1):63-68.
7. van Noort-van der Spek IL, Franken MCJP, Weisglas-Kuperus N. Language functions in preterm-born children: a systematic review and meta-analysis. *Pediatrics.* 2012;129(4):745-754. doi:10.1542/peds.2011-1728
8. Reidy N, Morgan A, Thompson DK, Inder TE, Doyle LW, Anderson PJ. Impaired language abilities and white matter abnormalities in children born very preterm and/or very low birth weight. *J Pediatr.* 2013;162(4):719-724. doi:10.1016/j.jpeds.2012.10.017
9. Goodman R. The Strengths and Difficulties Questionnaire: a research note. *J Child Psychol Psychiatry.* 1997;38(5):581-586.
10. Auquier P, Clement A, Sapin C, Khammar ME, Marco JLS, Simeoni MC. Development, Validation of HRQL Measurement in Children: VSP-AE. *Qual Life Res.* 2001;10(3):268-268.
11. Ravens-Sieberer U. *The Kidscreen Questionnaires: Quality of Life Questionnaires for Children and Adolescents; Handbook.* Pabst Science Publ.; 2006.
12. Guimard P, Cosnefroy O, Florin A. Évaluation des comportements et des compétences scolaires par les enseignants et prédiction des performances et des parcours à l'école élémentaire et au collège. *Orientat Sc Prof.* 2007;(36/2):179-202. doi:10.4000/osp.1372
13. Boussicault G, Nguyen The Tich S, Branger B, et al. The Global School Adaptation score: a new neurodevelopmental assessment tool for very preterm children at five years of age. *J Pediatr.* 2013;163(2):460-464. doi:10.1016/j.jpeds.2013.01.052
14. Spielberger CD. Manual for the State-Trait Anxiety Inventory STAI (Form Y) ("Self-Evaluation Questionnaire"). Published online 1983. Accessed April 8, 2021. <http://ubir.buffalo.edu/xmlui/handle/10477/1873>

**eTable 2.** Demographics and Clinical Characteristics of the Included and Nonincluded Children at Birth and at 5 Years Old

| Characteristic                                                            | Total missing data. N | Eligible children (N=313) <sup>a</sup> |                         | p-value |
|---------------------------------------------------------------------------|-----------------------|----------------------------------------|-------------------------|---------|
|                                                                           |                       | Non-Participant (n=144)                | Participant (n=169)     |         |
| <i>At birth</i>                                                           |                       |                                        |                         |         |
| Maternal age. mean (SD)                                                   | 0                     | 30 y 4 mo<br>(5 y 9 mo)                | 30 y 2 mo<br>(6 y 3 mo) | .76     |
| Parents' socioprofessional status <sup>b</sup>                            | 20                    |                                        |                         | .34     |
| Higher                                                                    |                       | 95/134 (71)                            | 124/159 (78)            |         |
| Lower                                                                     |                       | 37/134 (28)                            | 33/159 (21)             |         |
| Without socioprofessional status                                          |                       | 2/134 (1)                              | 2/159 (1)               |         |
| Antenatal corticosteroid therapy with a full-course minimum               | 21                    | 96/135 (71)                            | 102/157 (65)            | .26     |
| Rescue course of antenatal corticosteroid therapy                         | 11                    | 3/139 (2)                              | 3/163 (2)               | >.99    |
| Antenatal administration of magnesium sulfate during last hospitalization | 12                    | 15/137 (11)                            | 22/164 (13)             | .52     |
| Multiple births                                                           | 0                     | 50/144 (35)                            | 47/169 (28)             | .19     |
| If two fetuses. chorionicity                                              | 17                    |                                        |                         | .10     |
| Dichorionic/diamniotic                                                    |                       | 29/41 (71)                             | 34/39 (87)              |         |
| Monochorionic/monoamniotic                                                |                       | 3/41 (7)                               | 0 (0)                   |         |
| Monochorionic/diamniotic                                                  |                       | 9/41 (22)                              | 5/39 (13)               |         |
| Gestational age. mean (SD), wk                                            | 0                     | 29.6 (2.5)                             | 29.6 (2.6)              | .90     |
| Birth weight. mean (SD), g                                                | 2                     | 1294.5 (472.4)                         | 1317.3 (506.0)          | .68     |
| Birth weight, percentile of EPOPé curves                                  | 2                     |                                        |                         | .47     |
| <10th                                                                     |                       | 67/142 (47)                            | 74/169 (44)             |         |
| ≥ 10th                                                                    |                       | 75/142 (53)                            | 95/169 (56)             |         |
| Child's sex                                                               | 0                     |                                        |                         | .40     |
| Female                                                                    |                       | 73/144 (51)                            | 78/169 (46)             |         |
| Male                                                                      |                       | 71/144 (49)                            | 91/169 (54)             |         |
| Mode of delivery                                                          | 6                     |                                        |                         | .45     |
| Vaginal without instruments                                               |                       | 42/141 (30)                            | 40/166 (24)             |         |
| Vaginal with instruments                                                  |                       | 3/141 (2)                              | 6/166 (4)               |         |
| Cesarean                                                                  |                       | 96/141 (68)                            | 120/166 (72)            |         |
| Apgar at 5 minutes. mean (SD)                                             | 19                    | 8.7 (1.9)                              | 8.3 (2.0)               | .07     |
| Bronchopulmonary dysplasia <sup>c</sup>                                   | 13                    |                                        |                         | .81     |
| None                                                                      |                       | 98/137 (72)                            | 122/163 (75)            |         |
| Mild                                                                      |                       | 20/137 (15)                            | 20/163 (12)             |         |
| Moderate                                                                  |                       | 2/137 (1)                              | 4/163 (2)               |         |
| Severe                                                                    |                       | 17/137 (12)                            | 17/163 (10)             |         |
| Postnatal corticotherapy                                                  | 11                    | 15/139 (11)                            | 18/163 (11)             | .94     |
| Intraventricular hemorrhage                                               | 5                     |                                        |                         | .97     |
| None                                                                      |                       | 104/141 (74)                           | 121/167 (72)            |         |
| Grade 1 or Grade 2                                                        |                       | 32/141 (23)                            | 40/167 (24)             |         |
| Grade 3 or Grade 4                                                        |                       | 5/141 (4)                              | 6/167 (4)               |         |
| Necrotizing enterocolitis                                                 | 5                     | 5/142 (4)                              | 12/166 (7)              | .16     |
| Severe neonatal morbidity                                                 | 11                    | 29/138 (21)                            | 32/164 (20)             | .75     |
| Late-onset sepsis                                                         | 3                     | 31/143 (22)                            | 34/167 (20)             |         |
| Presence of severe lesions on last TFU scan before discharge              | 5                     | 9/141 (6)                              | 7/167 (4)               | .39     |
| <i>At five years old</i>                                                  |                       |                                        |                         |         |
| Child's age. mean (SD)                                                    | 1                     | 5 y 7 mo<br>(2 mo)                     | 5 y 7 mo<br>(2 mo)      | .06     |
| Visual-spatial index                                                      |                       |                                        |                         |         |
| Score. mean (SD)                                                          | 1                     | 91.9 (12.0)                            | 93.8 (11.5)             | .14     |
| Working memory index                                                      |                       |                                        |                         |         |
| Score. mean (SD)                                                          | 1                     | 81.3 (7.2)                             | 80.00 (5.3)             | .06     |

|                                               |     |             |             |            |
|-----------------------------------------------|-----|-------------|-------------|------------|
| Total MABC-2 score. mean (SD)                 | 7   | 76.7 (13.4) | 74.5 (14.3) | .17        |
| Intellectual functioning                      |     |             |             |            |
| Full scale IQ (FSIQ). Z-score. mean (SD)      | 1   | 88.2 (10.1) | 88.5 (10.3) | .83        |
| Verbal comprehension index. Score. mean (SD)  | 1   | 94.7 (13.5) | 96.1 (13.4) | .35        |
| Fluid reasoning index. Score. mean (SD)       | 1   | 92.4 (10.9) | 94.0 (12.3) | .24        |
| Processing speed index. Score. mean (SD)      | 1   | 92.2 (12.3) | 90.6 (12.3) | .26        |
| Executive and attention processes             |     |             |             |            |
| Inhibition. Score. mean (SD)                  | 70  | 8.7 (3.0)   | 7.9 (3.1)   | <b>.05</b> |
| Stature. Score. mean (SD)                     | 30  | 9.6 (3.5)   | 9.3 (3.3)   | .42        |
| Speeded Naming. Score. mean (SD)              | 115 | 10.0 (3.1)  | 9.7 (2.9)   | .41        |
| Educational assistance at school <sup>d</sup> | 37  | 21/127 (17) | 32/149 (21) | .30        |
| Medical consultation <sup>f</sup>             | 37  | 68/128 (53) | 88/148 (59) | .29        |

Abbreviations: EPOPé=Obstetrical, Perinatal and Pediatric Epidemiology Research Team of the Center for Research on Epidemiology and Statistics Sorbonne Paris Cité (CRESS) at the National Institute for Health and Medical Research (INSERM) and the Paris-Descartes University, CPAP=Continuous Positive Airway Pressure, FIO<sub>2</sub>=Fraction of inspired oxygen, IVH=Intraventricular hemorrhage, MABC-2=Movement Assessment Battery for Children - Second Edition, TFU=transfontanelar ultrasonography.

Note:

<sup>a</sup>Data are presented as the number of participants with data/total number (percentage) unless otherwise indicated.

<sup>b</sup>Higher socio-professional status comprises three working categories: managerial, intermediate, and administrator. Lower socio-professional status comprise two working categories: domestic or sales employee.

<sup>c</sup>Mild BPD was defined as 28 or more days of oxygen and spontaneous respiration-room air at 36 weeks. Moderate BPD was defined as 28 or more days of oxygen and mechanical ventilation or continuous positive airway pressure or fraction of inspired oxygen greater than 21% at 36 weeks. Severe BPD was defined as 28 or more days of oxygen and mechanical ventilation or continuous positive airway pressure or fraction of inspired oxygen greater than 21% at 36 weeks.

<sup>d</sup>Children who benefitted from any the following school assistance: special needs teaching assistant, assistance by any other professional, technical aid, personalized educational plans for children with disabilities, and other types of support.

<sup>f</sup>Children who in the 12 months before inclusion in the study, were followed up at a specialist center (Early Medical-Social Action Centers and Medical Psychologic Centers of Early Childhood) or benefitted from 1 or more medical consultations by the following professionals: psychologist, psychometrician, orthoptist, speech therapist, and/or physiotherapist.

**eTable 3.** Description of Training Adherence in the Intervention Group: All Participants Randomized in Intervention Group and Participants Who Completed at least 15, 20, and 25 Training Sessions

|                             | Participants randomized in Intervention group |             | Participants who completed at least 15 training sessions |            | Participants who completed at least 20 training sessions |             | Participants who completed at least 25 training sessions |             |
|-----------------------------|-----------------------------------------------|-------------|----------------------------------------------------------|------------|----------------------------------------------------------|-------------|----------------------------------------------------------|-------------|
|                             | Participants, No.                             | Mean (SD)   | Participants, No.                                        | Mean (SD)  | Participants, No.                                        | Mean (SD)   | Participants, No.                                        | Mean (SD)   |
| Number of sessions          | 84                                            | 18.1 (9.1)  | 57                                                       | 23.8 (2.5) | 52                                                       | 24.4 (1.4)  | 43                                                       | 25.00       |
| Starting index <sup>a</sup> | 84                                            | 41.4 (17.0) | 57                                                       | 47.5 (6.1) | 52                                                       | 46.8 (5.9)  | 43                                                       | 45.9 (5.60) |
| Maximum index <sup>b</sup>  | 84                                            | 59.5 (24.4) | 57                                                       | 70.8 (6.9) | 52                                                       | 70.6 (7.00) | 43                                                       | 70.00 (6.9) |
| Progress Index <sup>c</sup> | 84                                            | 18.2 (10.3) | 57                                                       | 23.4 (6.4) | 52                                                       | 23.8 (6.3)  | 43                                                       | 24.0 (6.3)  |

Note:

<sup>a</sup> Calculated from the results obtained on the second and third working days, and the maximum index

<sup>b</sup> Calculated from the results obtained during the two best days of the training

<sup>c</sup> Calculated by subtracting the "Starting index" from the "Maximum index". The average expected progress index is around 24 units, but the distribution is wide and an average rate of progress is between 14 and 32 units, Higher Index scores indicate good compliance and effort with the training.



**eTable 4.** Training Adherence in the Intervention Group According to Parents' Socioprofessional Status and Educational Level With Missing Data Imputation: All Participants Randomized in Intervention Group and Participants Who Completed at least 15, 20, and 25 Training Sessions

| Participants randomized in Intervention group                       | Participants who completed at least 15 training sessions |         | Participants who completed at least 20 training sessions |         | Participants who completed at least 25 training sessions |         |
|---------------------------------------------------------------------|----------------------------------------------------------|---------|----------------------------------------------------------|---------|----------------------------------------------------------|---------|
|                                                                     | OR (95%CI)                                               | P value | OR (95%CI)                                               | P value | OR (95%CI)                                               | P value |
| Higher parents' socio-professional status <sup>a</sup> . yes. n (%) | 2.2 (0.7-6.5)                                            | .15     | 2.7 (0.9-8.0)                                            | .08     | 3.1 (1.0-9.3)                                            | .05     |
| Parents' educational level <sup>b</sup> . yes, n (%)                | 1.3 (0.5-3.7)                                            | .57     | 1.5 (0.5-3.9)                                            | .45     | 1.2 (0.5-3.1)                                            | .71     |

Abbreviations: OR = Odds Ratio; CIs=Confidence Intervals

Note:

<sup>a</sup> Higher socio-professional status comprise three working categories: managerial, intermediate, and administrator.

<sup>b</sup> At least one parent with an academics degree of least a first-year university level

**eTable 5.** Sensitivity Analysis Adjusted With and Without Missing Data Imputations Restricted to Children Who Completed at least 20 or 25 Sessions of Training in the Intervention Group

|                                                                                   |                                        | Participants,<br>No. | Inclusion visit                           |                         | Intermediate visit                        |                         | Final visit                               |                         |
|-----------------------------------------------------------------------------------|----------------------------------------|----------------------|-------------------------------------------|-------------------------|-------------------------------------------|-------------------------|-------------------------------------------|-------------------------|
|                                                                                   |                                        |                      | Group difference<br>(95% CI) <sup>a</sup> | P<br>value <sup>b</sup> | Group difference<br>(95% CI) <sup>a</sup> | P<br>value <sup>b</sup> | Group difference<br>(95% CI) <sup>a</sup> | P<br>value <sup>b</sup> |
| Participants who completed at least 20 sessions of training in Intervention group |                                        |                      |                                           |                         |                                           |                         |                                           |                         |
| Without missing data imputations                                                  | Visual-spatial index. Score. mean (SD) | 91                   | 0.6 (-4.3 ; 5.5)                          | .81                     | -1.0 (-6.0 ; 3.9)                         | .68                     | -3.5 (-9.5 ; 2.6)                         | .26                     |
|                                                                                   | Working memory index. Score. mean (SD) | 91                   | 2.0 (-0.5 ; 4.6)                          | .11                     | 4.8 (0.7 ; 8.9)                           | <b>.02</b>              | 2.3 (-2.2 ; 6.9)                          | .31                     |
| With missing data imputations                                                     | Visual-spatial index. Score. mean (SD) | 137                  | 1.2 (-2.8 ; 5.3)                          | .56                     | -0.1 (-4.4 ; 4.1)                         | .96                     | -0.2 (-6.8 ; 6.4)                         | .96                     |
|                                                                                   | Working memory index. Score. mean (SD) | 137                  | 0.9 (-1.1 ; 3.0)                          | .37                     | 5.9 (2.3 ; 9.4)                           | <b>.001</b>             | 3.1 (-1.9 ; 8.1)                          | .22                     |
| Participants who completed at least 25 sessions of training in Intervention group |                                        |                      |                                           |                         |                                           |                         |                                           |                         |
| Without missing data imputations                                                  | Visual-spatial index. Score. mean (SD) | 84                   | -0.4 (-5.7 ; 4.9)                         | .88                     | -0.9 (-6.2 ; 4.5)                         | .74                     | -1.5 (-7.9 ; 4.9)                         | .64                     |
|                                                                                   | Working memory index. Score. mean (SD) | 84                   | 1.7 (-1.0 ; 4.4)                          | .21                     | 4.9 (0.5 ; 9.3)                           | <b>.03</b>              | 1.3 (-3.2 ; 5.7)                          | .57                     |
| With missing data imputations                                                     | Visual-spatial index. Score. mean (SD) | 128                  | 0.4 (-3.9 ; 4.7)                          | .86                     | -0.03 (-4.6 ; 4.5)                        | .99                     | 0.5 (-5.7 ; 6.7)                          | .88                     |
|                                                                                   | Working memory index. Score. mean (SD) | 128                  | 0.8 (-1.4 ; 2.9)                          | .49                     | 5.8 (2.1 ; 9.5)                           | <b>.002</b>             | 1.9 (-3.1 ; 6.9)                          | .46                     |

Abbreviations: CIs=Confidence Intervals

Note:

<sup>a</sup> A group difference greater than 0 reflects a higher score in the intervention group, and less than 0 reflects a lower score

<sup>b</sup> Results are adjusted for neurodevelopmental profile severity for 3 subtests of NEPSY, 2nd Edition: auditory attention score, design fluency score, and inhibition score; 1 subtest of the Wechsler Preschool and Primary Scale of Intelligence, 4th Edition (processing speed index); the presence of an impairment in motor performance, assessed by the motor assessment of Movement Assessment Battery for Children, 2nd Edition scores in the 5th percentile or lower); and gestational age, birth weight, child's sex, parents' socioprofessional status, and parents' educational level.

**eTable 6.** Missing Data Distribution

|                                                                             |       |         | %       |
|-----------------------------------------------------------------------------|-------|---------|---------|
| <b>Missing data distribution</b>                                            | Valid | Missing | missing |
| Final visit - Working Memory Index                                          | 131   | 38      | 22.5    |
| Final visit - Visual-Spatial Index                                          | 136   | 33      | 19.5    |
| Baseline (EpiPAGE 2 database) - Inhibition                                  | 136   | 33      | 19.5    |
| Intermediate visit - Visual-Spatial Index                                   | 150   | 19      | 11.2    |
| Intermediate visit - Working Memory Index                                   | 150   | 19      | 11.2    |
| Inclusion visit - Parents' educational level                                | 157   | 12      | 7.1     |
| Baseline (EpiPAGE 2 database) - Parents' socio-professional status          | 159   | 10      | 5.9     |
| Baseline (EpiPAGE 2 database) - Manual Dexterity, Aiming, Catching, Balance | 163   | 6       | 3.6     |
| Inclusion visit - Auditory attention                                        | 166   | 3       | 1.8     |
| Inclusion visit - Design Fluency                                            | 166   | 3       | 1.8     |
| Baseline (EpiPAGE 2 database) - Birth weight                                | 169   | 0       | 0.0     |
| Baseline (EpiPAGE 2 database) - Visual-Spatial Index                        | 169   | 0       | 0.0     |
| Baseline (EpiPAGE 2 database) - Working Memory Index                        | 169   | 0       | 0.0     |
| Baseline (EpiPAGE 2 database) - Sex of child                                | 169   | 0       | 0.0     |
| Baseline (EpiPAGE 2 database) - Processing Speed Index                      | 169   | 0       | 0.0     |
| Baseline (EpiPAGE 2 database) - Gestational age                             | 169   | 0       | 0.0     |
