# Supplementary material for: Cognitive Training for Visuospatial Processing in Children Aged 5½ to 6 Years Born Very Preterm With Working Memory Dysfunction: A Randomized Clinical Trial
Source: PubMed Central journal article supplement (PMC10485729; doi:10.1001/jamanetworkopen.2023.31988), 2023-09-07
Supplement: jamanetwopen-e2331988-s003.pdf [file jamanetwopen-e2331988-s003.pdf]

\*First name, last name, and suffix (if applicable) are required and will appear in PubMed.

| <b>*Group Name(s): EPIREMED Study Group</b> |                   |                              |                  |                                        |                                          |                                                         |                                                                                            |
|---------------------------------------------|-------------------|------------------------------|------------------|----------------------------------------|------------------------------------------|---------------------------------------------------------|--------------------------------------------------------------------------------------------|
| <b>*First Name and Middle Initial(s)</b>    | <b>*Last Name</b> | <b>*Suffix (eg, Jr, III)</b> | Academic Degrees | Institution                            | Location (city, state/province, country) | Role or Contribution, eg, chair, principal investigator | Group (if more than 1 Group listed in the byline) and/or Subgroup (eg, Steering Committee) |
| Barthélémy                                  | TOSELLO           |                              |                  | AP-HM, France                          | Marseille, France                        | Investigator                                            |                                                                                            |
| Veronique                                   | BREVAUT           |                              |                  | AP-HM, France                          | Marseille, France                        | Investigator                                            |                                                                                            |
| Patricia                                    | GARCIA            |                              |                  | AP-HM, France                          | Marseille, France                        | Investigator                                            |                                                                                            |
| Tristan                                     | DESILES           |                              |                  | AP-HM, France                          | Marseille, France                        | Neuropsychologist                                       |                                                                                            |
| Gwenaëlle                                   | MENARD            |                              |                  | AP-HM, France                          | Marseille, France                        | Neuropsychologist                                       |                                                                                            |
| Mérodie                                     | PACHE             |                              |                  | AP-HM, France                          | Marseille, France                        | Neuropsychologist                                       |                                                                                            |
| Ludovic-Mohamed                             | ZAHED             |                              |                  | AP-HM, France                          | Marseille, France                        | Neuropsychologist                                       |                                                                                            |
| Delphine                                    | MITANCHEZ         |                              |                  | AP- HP - Armand Trousseau Hospital,    | Paris, France                            | Investigator                                            |                                                                                            |
| Charlotte                                   | COUDRONNIERE      |                              |                  | University Hospital of Nantes, France  | Nantes, France                           | Neuropsychologist                                       |                                                                                            |
| Mireille                                    | DENAVEAUT BOULAY  |                              |                  | University Hospital of Caen Normand    | Caen, France                             | Neuropsychologist                                       |                                                                                            |
| Elodie                                      | FALQUE            |                              |                  | University Hospital of Nîmes, France   | Nîmes, France                            | Neuropsychologist                                       |                                                                                            |
| Magali                                      | REBATEL           |                              |                  | University Hospital of Nîmes, France   | Nîmes, France                            | Neuropsychologist                                       |                                                                                            |
| Karine                                      | VOIRIN            |                              |                  | University Hospital of Reims, France   | Reims, France                            | Neuropsychologist                                       |                                                                                            |
| Eliane                                      | BASSON            |                              |                  | University Hospital of Lyon, France    | Lyon, France                             | Investigator                                            |                                                                                            |
| Sophie                                      | RUBIO GURUNG      |                              |                  | University Hospital of Lyon, France    | Lyon, France                             | Investigator                                            |                                                                                            |
| Mérodie                                     | RODRIGUEZ         |                              |                  | University Hospital of Lyon, France    | Lyon, France                             | Neuropsychologist                                       |                                                                                            |
| Hélène                                      | DEFORGE           |                              |                  | Regional University Hospital of Nancy  | Nancy, France                            | Neuropsychologist                                       |                                                                                            |
| Marie                                       | LEMARCHAND        |                              |                  | University Hospital of Rouen, France   | Rouen, France                            | Neuropsychologist                                       |                                                                                            |
| Emeline                                     | DUBOIS            |                              |                  | University Hospital of Toulouse, Fran  | Toulouse, France                         | Neuropsychologist                                       |                                                                                            |
| Stéphanie                                   | IANNUZZI          |                              |                  | University Hospital of Toulouse, Fran  | Toulouse, France                         | Neuropsychologist                                       |                                                                                            |
| Julie                                       | OERTEL            |                              |                  | University Hospital of Nice, France    | Nice, France                             | Investigator                                            |                                                                                            |
| Anne                                        | DE SAINT MARTIN   |                              |                  | Regional University Hospital of Strask | Strasbourg, France                       | Investigator                                            |                                                                                            |
| Claire                                      | ZORES KOENIG      |                              |                  | Regional University Hospital of Strask | Strasbourg, France                       | Investigator                                            |                                                                                            |
| Hélène                                      | MUSMEAUX          |                              |                  | Regional University Hospital of Strask | Strasbourg, France                       | Neuropsychologist                                       |                                                                                            |
| Lucille                                     | SCHNEIDER         |                              |                  | Regional University Hospital of Strask | Strasbourg, France                       | Neuropsychologist                                       |                                                                                            |
| Claire                                      | LERAT             |                              |                  | University Hospital of Montpellier, Fr | Montpellier, France                      | Neuropsychologist                                       |                                                                                            |
| Angélique                                   | PANNETIER         |                              |                  | University Hospital of Clermont-Ferra  | Clermont-Ferrand, France                 | Neuropsychologist                                       |                                                                                            |
| Isabelle                                    | PIN               |                              |                  | University Hospital of Grenoble, Fran  | Grenoble, France                         | Investigator                                            |                                                                                            |

## Supplemental Online Content: Nonauthor Collaborators

\*First name, last name, and suffix (if applicable) are required and will appear in PubMed.

| *First Name and Middle Initial(s) | *Last Name      | *Suffix (eg, Jr, III) | Academic Degrees | Institution                             | Location (city, state/province, country) | Role or Contribution, eg, chair, principal investigator | Group (if more than 1 Group listed in the byline) and/or Subgroup (eg, Steering Committee) |
|-----------------------------------|-----------------|-----------------------|------------------|-----------------------------------------|------------------------------------------|---------------------------------------------------------|--------------------------------------------------------------------------------------------|
| Thierry                           | DEBILLON        |                       |                  | University Hospital of Grenoble, France | Grenoble, France                         | Investigator                                            |                                                                                            |
| Karine                            | GUICHARDET      |                       |                  | University Hospital of Grenoble, France | Grenoble, France                         | Neuropsychologist                                       |                                                                                            |
| Patrick                           | ZANDER          |                       |                  | University Hospital of Tour, France     | Tour, France                             | Neuropsychologist                                       |                                                                                            |
| Elie                              | SALIBA          |                       |                  | University Hospital of Tour, France     | Tour, France                             | Investigator                                            |                                                                                            |
| Valérie                           | BENHAMMOU       |                       |                  | University of Paris, CRESS, Obstetrics  | Paris, France                            | Research Assistant                                      |                                                                                            |
| Monique                           | KAMINSKI        |                       |                  | University of Paris, CRESS, Obstetrics  | Paris, France                            | Methodologist                                           |                                                                                            |
| Laetitia                          | MARCHAND-MARTIN |                       |                  | University of Paris, CRESS, Obstetrics  | Paris, France                            | Statistician                                            |                                                                                            |
| Samira                            | MEDJAHED        |                       |                  | University of Paris, CRESS, Obstetrics  | Paris, France                            | Research Assistant                                      |                                                                                            |
| Johanne                           | PIRRELLO        |                       |                  | AP-HM, France                           | Marseille, France                        | Research Assistant                                      |                                                                                            |
| Julie                             | BERBIS          |                       |                  | CEReSS - Health Service Research and    | Marseille, France                        | Methodologist                                           |                                                                                            |
| Pascal                            | AUQUIER         |                       |                  | CEReSS - Health Service Research and    | Marseille, France                        | Methodologist                                           |                                                                                            |
| Karine                            | BAUMSTARCK      |                       |                  | CEReSS - Health Service Research and    | Marseille, France                        | Methodologist                                           |                                                                                            |
